# Supplementary material for: Dynamics and polarization of superparamagnetic chiral nanomotors in a rotating magnetic field
Source: Royal Society of Chemistry journal article supplement (doi:10.1039/c4nr02953d), 2014-01-01
Supplement: c4nr02953d1.pdf [file c4nr02953d1.pdf]

**Electronic Supplementary Information for:**  
**Dynamics and polarization of superparamagnetic chiral  
nanomotors in a rotating magnetic field**

Konstantin I. Morozov and Alexander M. Leshansky\*

*Department of Chemical Engineering and Russel Berrie Nanotechnology Institute (RBNI),  
Technion – Israel Institute of Technology, Haifa 32000, Israel*

(Dated: September 2, 2014)

---

\* lisha@tx.technion.ac.il

## I. Rotation matrix

We use the definition of the three Euler angles  $\varphi$ ,  $\theta$  and  $\psi$  following Ref. [1]. The components of any vector  $\mathbf{W}$  in the body-fixed coordinate system (BCS) and in the laboratory coordinate system (LCS) are determined from the relation  $\mathbf{W}^{BCS} = \mathbf{R} \cdot \mathbf{W}$ , where  $\mathbf{R}$  is the rotation matrix. The rotation matrix is expressed explicitly via the Euler angles [2]

$$\mathbf{R} = \begin{pmatrix} c_\varphi c_\psi - s_\varphi s_\psi c_\theta & s_\varphi c_\psi + c_\varphi s_\psi c_\theta & s_\psi s_\theta \\ -c_\varphi s_\psi - s_\varphi c_\psi c_\theta & -s_\varphi s_\psi + c_\varphi c_\psi c_\theta & c_\psi s_\theta \\ s_\varphi s_\theta & -c_\varphi s_\theta & c_\theta \end{pmatrix},$$

where we use the compact notation,  $s_\psi = \sin \psi$ ,  $c_\theta = \cos \theta$ , etc.

## II. Approximate rotational viscous resistance coefficients of a helix

We approximate the rotational viscous resistance coefficients of a helical propeller by the corresponding values for a prolate spheroid approximating the helix. Let  $a$  and  $b$  be, correspondingly, the longitudinal (along the symmetry axis) and transversal semi-axes of the spheroid. The respective viscous resistances due to rotation about the symmetry axis and in perpendicular direction read [3]

$$\kappa_{\parallel} = 2\eta V n_{\perp}^{-1}, \quad \kappa_{\perp} = 2\eta V \frac{a^2 + b^2}{a^2 n_{\parallel} + b^2 n_{\perp}}, \quad (\text{S1})$$

where  $\eta$  is the dynamic viscosity of the liquid,  $V$  is the spheroid volume,  $n_{\parallel}$  and  $n_{\perp} = (1 - n_{\parallel})/2$  are the depolarizing factors of the spheroid. For the prolate spheroid with  $a > b$  and eccentricity  $e = \sqrt{1 - b^2/a^2}$  the depolarizing factor along the symmetry axis reads [4]

$$n_{\parallel} = \frac{1 - e^2}{e^3} \left( \frac{1}{2} \ln \frac{1 + e}{1 - e} - e \right). \quad (\text{S2})$$

## III. Particle-based numerical algorithm

The numerical procedure used to compute the various components of the viscous resistance tensor is based on multipole expansion scheme [5]. The filament is constructed from nearly touching  $N$  rigid spheres (“shish-kebab” filament) having the same radius  $r = 1$ . The no-slip condition at the surface of all spheres is enforced rigorously via the use of direct

transformation between solid spherical harmonics centered at origins of different spheres. The method yields a system of  $\mathcal{O}(N\mathcal{L}^2)$  linear equations for the expansion coefficients and the accuracy of calculations is controlled by the number of spherical harmonics (i.e. truncation level),  $\mathcal{L}$ , retained in the series. This approach has been applied before for modeling low-Reynolds-number swimmers, e.g., rotating helix [6, 7] and undulating filament [8].

The spheres composing the helical filament are partitioned along the backbone of the filament  $\mathbf{X}(s)$  (see Eq. (21) and Fig. S1) so that the distance between centers of neighboring spheres is set to  $2.02r$ . The motion of the  $i$ th sphere composing a helix can be decomposed into translation  $\mathbf{U}_i$  and rotation  $\boldsymbol{\omega}_i$  about its center, as  $\mathbf{V}_i = \mathbf{U}_i + \boldsymbol{\omega}_i \times \mathbf{r}_i$  with  $\mathbf{r}_i$  being the radius vector with origin at the center of  $i$ th sphere. For any prescribed rigid-body-motion of the helix,  $\{\mathbf{U}_i, \boldsymbol{\omega}_i\}$  are determined uniquely. For instance, for computing the components of the resistance tensor, such as  $\xi_{\parallel}, \kappa_{\parallel}$  and  $\mathcal{B}_{\parallel}$ , associated with translation  $U$  and rotation  $\omega$  about the  $x_3$ -axis, one has  $\boldsymbol{\omega}_i = \mathbf{e}_3 \omega$  and  $\mathbf{U}_i = U \mathbf{e}_3 + \omega \mathbf{e}_3 \times \mathbf{R}_i$ , where  $\mathbf{R}_i$  is a position vector to the  $i$ th sphere center.

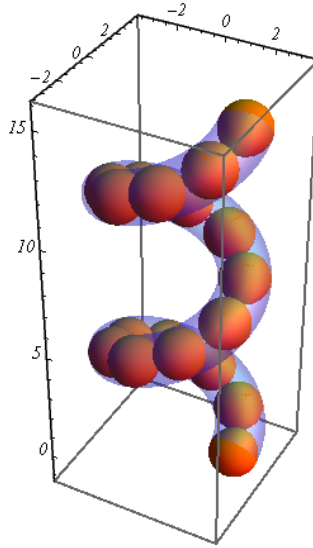

FIG. S1. Illustration of particle-based “shish-kebab” 2-turn helix approximating the regular helix with circular cross section of radius  $r = 1$  (transparent blue) with helical radius  $R = 2.5$  and pitch angle  $\Theta = 65^\circ$ .

#### IV. Demagnetizing factors of infinitely long elliptic cylinder

The demagnetizing factor  $N$  of infinitely long cylinder with an elliptic cross-section with corresponding semi-axes  $\hat{a}$  and  $\hat{b}$  was reported in Ref. [9]:

$$N = (2\pi)^{-1} \left[ 4 \arctan \frac{\hat{a}}{\hat{b}} + \frac{2\hat{b}}{\hat{a}} \ln \frac{\hat{b}}{\hat{a}} + \left( \frac{\hat{a}}{\hat{b}} - \frac{\hat{b}}{\hat{a}} \right) \ln \left( 1 + \frac{\hat{b}^2}{\hat{a}^2} \right) \right].$$

At  $\hat{a} > \hat{b}$  it determines the demagnetization factor  $N_1$  along the short axis. The demagnetizing factor  $N_2$  can be found either by the permutation  $\hat{a} \leftrightarrow \hat{b}$  or from the equality  $N_1 + N_2 = 1$ . For the regular helix with circular cross-section  $N_1 = N_2 = 1/2$ .

- 
- [1] Landau, L. D.; Lifshitz, E. M. *Mechanics*, 3rd ed.; Pergamon Press, Oxford, 1976.
  - [2] Diebel, J. *Representing Attitude: Euler Angles, Unit Quaternions, and Rotation Vectors*; Matrix, Citeseer, 2006.
  - [3] Jeffrey, G. B. The motion of ellipsoidal particles immersed in a viscous fluid. *Proc. R. Soc. London A* **1922**, *102*, 161–179.
  - [4] Landau, L. D.; Lifshitz, E. M. *Electrodynamics of Continuous Media*, 2nd ed.; Pergamon Press, Oxford, 1984.
  - [5] A. V. Filippov, *J. Colloid Interface Sci.*, 2000, **229**, 184–195.
  - [6] A. M. Leshansky, *Phys. Rev. E*, 2009, **80**, 051911.
  - [7] K. I. Morozov and A. M. Leshansky, *Nanoscale*, 2014, **6**, 1580–1588.
  - [8] R. S. Berman, O. Kenneth, J. Sznitman and A. M. Leshansky, *New J. Phys.*, 2013, **15**, 075022.
  - [9] Brown Jr., W. F. *Magnetostatic Principles in Ferromagnetism*; North-Holland, Amsterdam, 1962.
